# Supplementary material
Source: publisher site journal article supplement (http://www.spandidos-publications.com/4020/downloadSupplementary)

Figure S1. Pathways involved in lung cancer and correlation analysis of XBP1 with MAPK. (A) Pathways involved in non-small cell lung cancer using the Kyoto Encyclopedia of Genes and Genomes database. (B) Correlation analysis of the association between XBP1 and p-ERK (MAPK1), and p-p38 (MAPK14) using the GEPIA database. XBP1, X-box binding protein 1; p, phosphorylated.

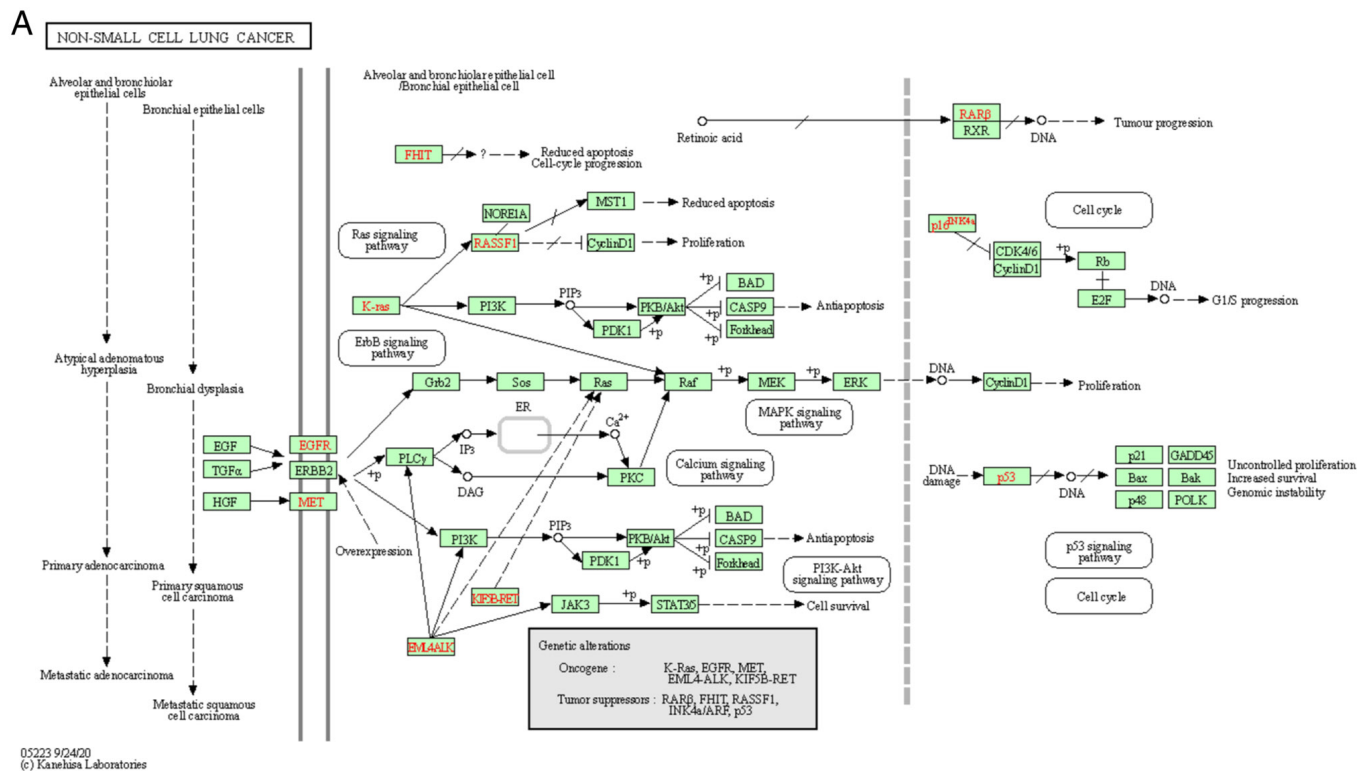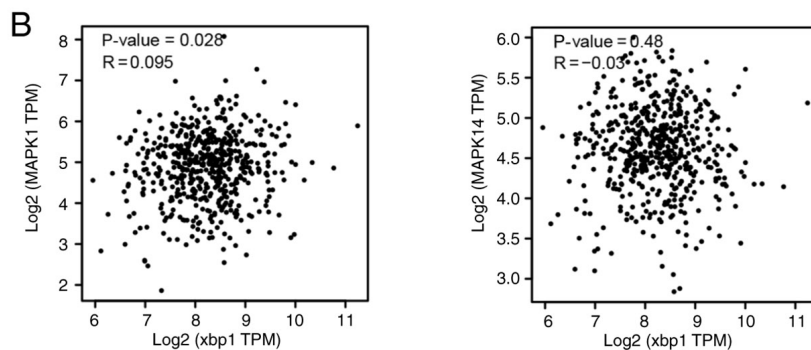

Supplement: Supplementary file 1 [file downloadSupplementary]
